# Supplementary material for: Electrochemical synthesis of large-area cobalt microparticle chain networks on Ni thin layer and their template applications
Source: Royal Society of Chemistry journal article supplement (doi:10.1039/c1ra00170a), 2011-01-01
Supplement: c1ra00170a.pdf [file c1ra00170a.pdf]

## Supporting Information

### Electrochemical Synthesis of Large-Area Cobalt Microparticle Chain Networks on Ni Thin Layer and Their Template Applications

Xiao-Hui He, Gao-Ren Li,\* Zi-Long Wang, Liang-Xin Ding, Ye-Xiang Tong

*KLGHEI of Environment and Energy Chemistry/MOE of Key Laboratory of Bioinorganic and Synthetic Chemistry/School of Chemistry and Chemical Engineering/Institute of Optoelectronic and Functional Composite Materials/Sun Yat-sen University, Guangzhou 510275, China*

Email: [ligaoren@mail.sysu.edu.cn](mailto:ligaoren@mail.sysu.edu.cn)

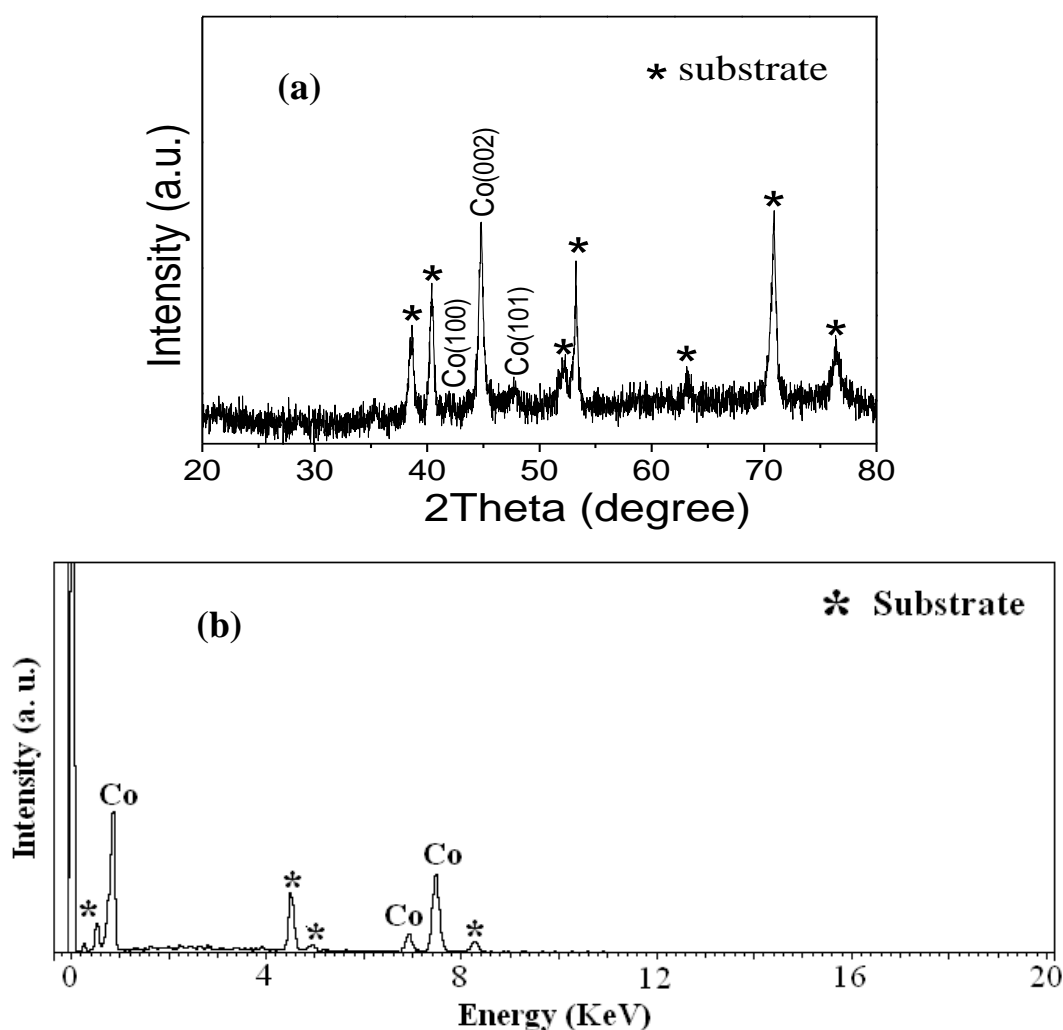

**Figure S1.** (a) XRD and (b) EDS patterns of Co nanoparticle chain networks.

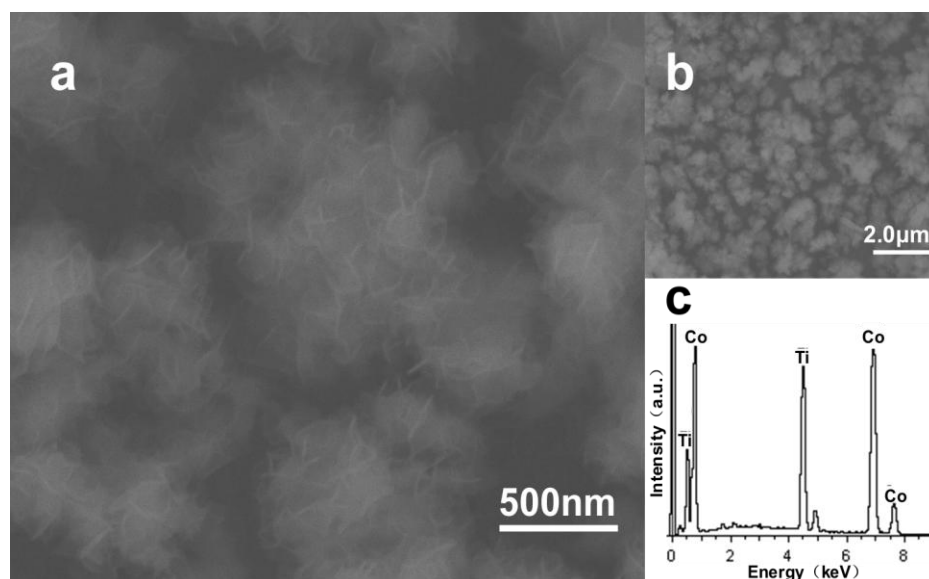

**Figure S2.** (a-b) SEM images of the flocculent Co deposits with different magnifications on titanium substrate without Ni thin film; (c) EDS pattern of Co films on titanium substrate. (The Ti peaks come from the substrate)

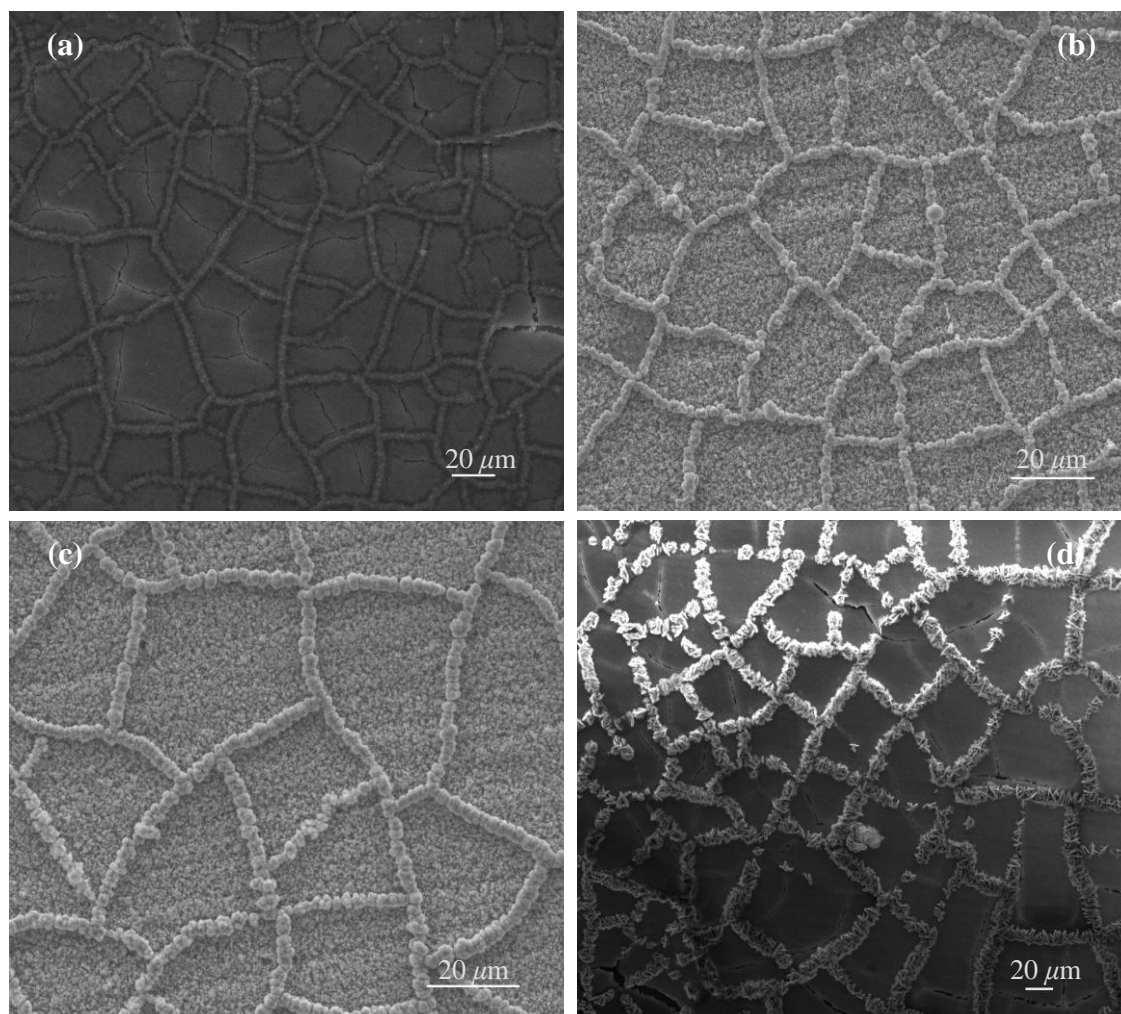

**Figure S3.** SEM images of the other synthesized Co nanoparticle chain networks.

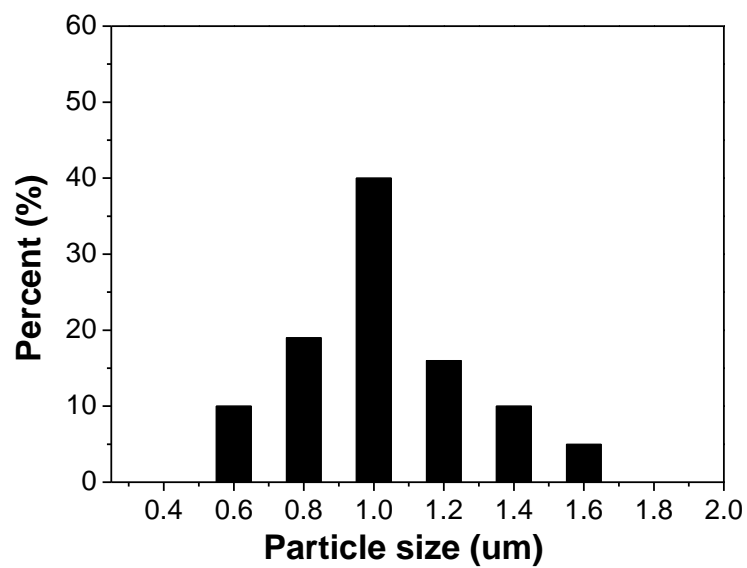

**Figure S4.** The histogram of Co particle size distribution in Co nanoparticle chain networks shown in Figure 1a.

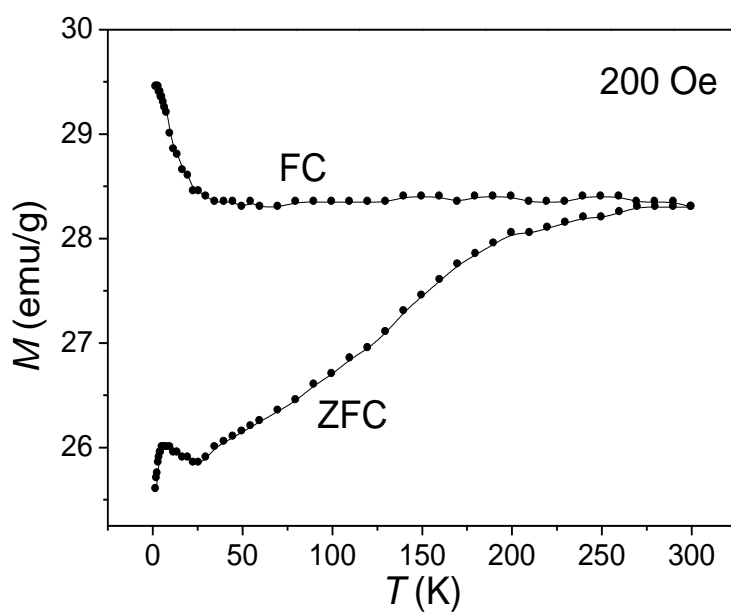

**Figure S5.** FC-ZFC curves of Co nanoparticle chain networks.

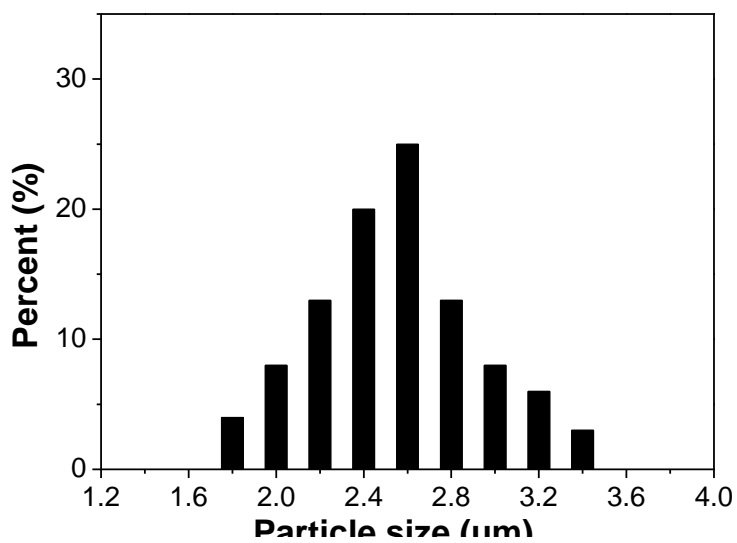

**Figure S6.** The histogram of Pt particle size distribution in Pt nanoparticle chain networks.

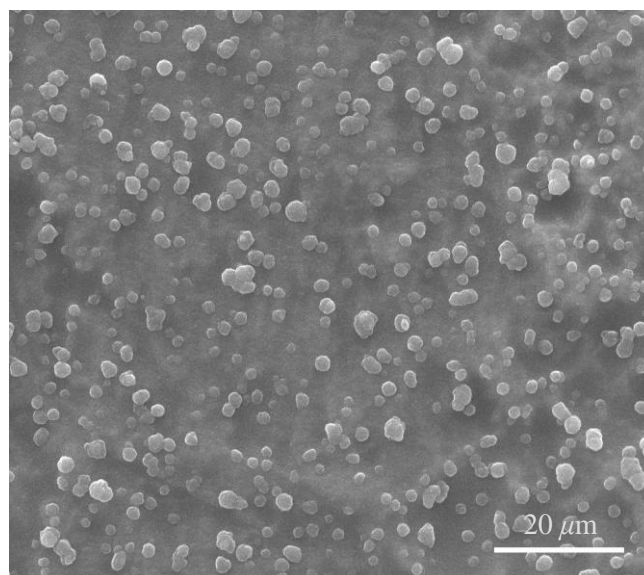

**Figure S7.** SEM image of out-of-order Pt nanoparticles.

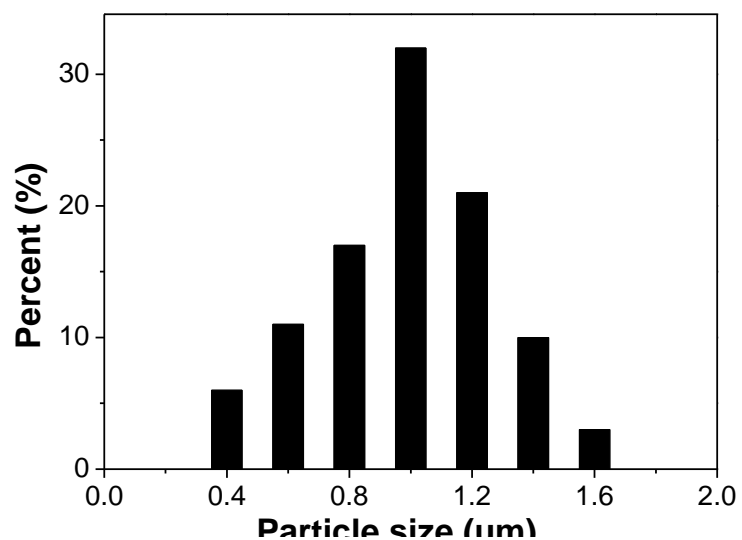

**Figure S8.** The histogram of Pt-Pd particle size distribution in Pt-Pd nanoparticle chain networks.

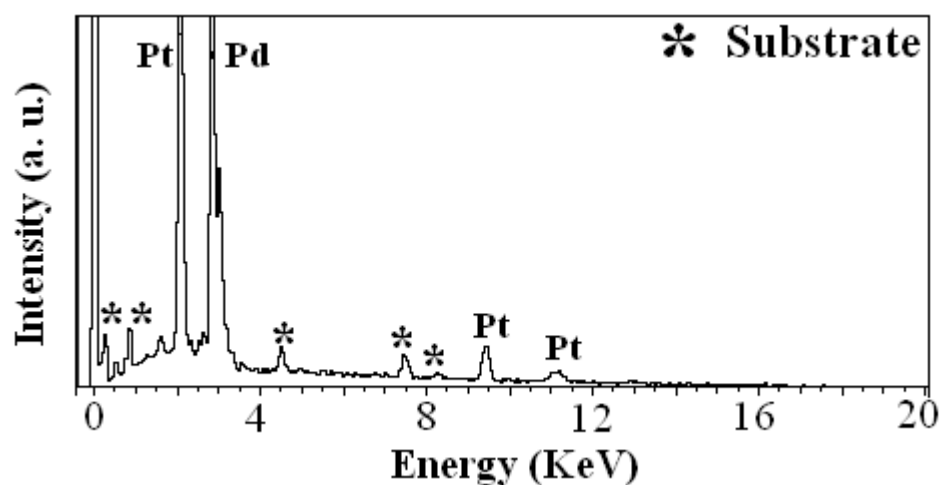

**Figure S9.** EDS pattern measured on the surface of Pt-Pd nanoparticle chain networks.
